# Supplementary material
Source: PubMed Central journal article supplement (PMC5752884)
Supplement: ajtr0009-5320-f8.pdf [file ajtr0009-5320-f8.pdf]

## IL-25 enhances the capacity of mesenchymal stem cells

**Supplementary Table 1.** Clinical characteristic of patients with IBD

|                       | Biopsy group |              | Blood group      |                  |
|-----------------------|--------------|--------------|------------------|------------------|
|                       | CD           | UC           | CD               | UC               |
| No of patients        | 32           | 25           | 27               | 22               |
| Age (yrs)             | 35.8 (20-48) | 36.2 (21-58) | 32.4 (18-48)     | 34.7 (21-60)     |
| Gender                |              |              |                  |                  |
| Male                  | 20           | 16           | 16               | 12               |
| Female                | 12           | 9            | 11               | 10               |
| Disease duration (mo) | 42 (14-65)   | 40 (12-78)   | 34 (12-72)       | 43 (15-68)       |
| Disease extent (UC)   |              |              |                  |                  |
| Proctitis             |              | 4            |                  |                  |
| Left-sided colitis    |              | 10           |                  |                  |
| Extensive colitis     |              | 11           |                  |                  |
| Disease location (CD) |              |              |                  |                  |
| Ileum                 | 5            |              |                  |                  |
| Colon                 | 18           |              |                  |                  |
| Ileum + colon         | 9            |              |                  |                  |
| ESR (mm/h)            |              |              | 43.8 (18.5-85.7) | 51.5 (15.6-90.3) |
| CRP (mg/L)            |              |              | 41.9 (21.3-89.6) | 39.7 (11.2-86.4) |

\*Data are shown as medians (interquartile ranges).
